# Supplementary material for: Molecular diversity and high virulence of Legionella pneumophila strains isolated from biofilms developed within a warm spring of a thermal spa
Source: PubMed Central journal article supplement (PMC3564684; doi:10.1186/1471-2180-13-17), 2013-01-28
Supplement: 1471-2180-13-17-S1.pdf [file 1471-2180-13-17-S1.pdf]

Additional file 1

1

mip2 GGGGCTTGGCAATGTCACACAGCAATGGCTGCAACCGGATGCCACATCATTAGCTACAGCAAGGATAAGTTGCTTATAGCA  
mip3 GGGGCTTGGCAATGTCACACAGCAATGGCTGCAACCGGATGCCACATCATTAGCTACAGCAAGGATAAGTTGCTTATAGCA  
LplCorby GGGGCTTGGCAATGTCACACAGCAATGGCTGCAACCGGATGCCACATCATTAGCTACAGCAAGGATAAGTTGCTTATAGCA  
LP1Lens GGGGCTTGGCAATGTCACACAGCAATGGCTGCAACCGGATGCCACATCATTAGCTACAGCAAGGATAAGTTGCTTATAGCA  
mip1 GGGGCTTGGCAATGTCACACAGCAATGGCTGCAACCGGATGCCACATCATTAGCTACAGCAAGGATAAGTTGCTTATAGCA  
LplParis GGGGCTTGGCAATGTCACACAGCAATGGCTGCAACCGGATGCCACATCATTAGCTACAGCAAGGATAAGTTGCTTATAGCA  
LplPhil GGGGCTTGGCAATGTCACACAGCAATGGCTGCAACCGGATGCCACATCATTAGCTACAGCAAGGATAAGTTGCTTATAGCA

81

mip2 TTGGTGCCGATTTGGGGAAGAAATTTTAAAAATCAAGGCATAGAGTTAAATCCGGAAAGCAATGGCTAAAGGCCATGCCAAGAC  
mip3 TTGGTGCCGATTTGGGGAAGAAATTTTAAAAATCAAGGCATAGAGTTAAATCCGGAAAGCAATGGCTAAAGGCCATGCCAAGAC  
LplCorby TTGGTGCCGATTTGGGGAAGAAATTTTAAAAATCAAGGCATAGAGTTAAATCCGGAAAGCAATGGCTAAAGGCCATGCCAAGAC  
LP1Lens TTGGTGCCGATTTGGGGAAGAAATTTTAAAAATCAAGGCATAGAGTTAAATCCGGAAAGCAATGGCTAAAGGCCATGCCAAGAC  
mip1 TTGGTGCCGATTTGGGGAAGAAATTTTAAAAATCAAGGCATAGAGTTAAATCCGGAAAGCAATGGCTAAAGGCCATGCCAAGAC  
LplParis TTGGTGCCGATTTGGGGAAGAAATTTTAAAAATCAAGGCATAGAGTTAAATCCGGAAAGCAATGGCTAAAGGCCATGCCAAGAC  
LplPhil TTGGTGCCGATTTGGGGAAGAAATTTTAAAAATCAAGGCATAGAGTTAAATCCGGAAAGCAATGGCTAAAGGCCATGCCAAGAC

161

mip2 GCTATGAGTGGCGCTCAATTTGGCTTTAACCCGAAACAGCAAAATGAAAGACGTTCTTAAACAAGTTTCAGAAAAGATTGATGGC  
mip3 GCTATGAGTGGCGCTCAATTTGGCTTTAACCCGAAACAGCAAAATGAAAGACGTTCTTAAACAAGTTTCAGAAAAGATTGATGGC  
LplCorby GCTATGAGTGGCGCTCAATTTGGCTTTAACCCGAAACAGCAAAATGAAAGACGTTCTTAAACAAGTTTCAGAAAAGATTGATGGC  
LP1Lens GCTATGAGTGGCGCTCAATTTGGCTTTAACCCGAAACAGCAAAATGAAAGACGTTCTTAAACAAGTTTCAGAAAAGATTGATGGC  
mip1 GCTATGAGTGGCGCTCAATTTGGCTTTAACCCGAAACAGCAAAATGAAAGACGTTCTTAAACAAGTTTCAGAAAAGATTGATGGC  
LplParis GCTATGAGTGGCGCTCAATTTGGCTTTAACCCGAAACAGCAAAATGAAAGACGTTCTTAAACAAGTTTCAGAAAAGATTGATGGC  
LplPhil GCTATGAGTGGCGCTCAATTTGGCTTTAACCCGAAACAGCAAAATGAAAGACGTTCTTAAACAAGTTTCAGAAAAGATTGATGGC

241

mip2 AAAGCGTACTGCTGGAATTCAAATAAGAAAGCCGGATGAAAATAAAGTAAAAGGGGAAGCCTTTTAACTGAAAACAAAAACA  
mip3 AAAGCGTACTGCTGGAATTCAAATAAGAAAGCCGGATGAAAATAAAGTAAAAGGGGAAGCCTTTTAACTGAAAACAAAAACA  
LplCorby AAAGCGTACTGCTGGAATTCAAATAAGAAAGCCGGATGAAAATAAAGTAAAAGGGGAAGCCTTTTAACTGAAAACAAAAACA  
LP1Lens AAAGCGTACTGCTGGAATTCAAATAAGAAAGCCGGATGAAAATAAAGTAAAAGGGGAAGCCTTTTAACTGAAAACAAAAACA  
mip1 AAAGCGTACTGCTGGAATTCAAATAAGAAAGCCGGATGAAAATAAAGTAAAAGGGGAAGCCTTTTAACTGAAAACAAAAACA  
LplParis AAAGCGTACTGCTGGAATTCAAATAAGAAAGCCGGATGAAAATAAAGTAAAAGGGGAAGCCTTTTAACTGAAAACAAAAACA  
LplPhil AAAGCGTACTGCTGGAATTCAAATAAGAAAGCCGGATGAAAATAAAGTAAAAGGGGAAGCCTTTTAACTGAAAACAAAAACA

321

mip2 AGCCAGGCCTGTGTGATTTGCCAAGTGGTTTGGCAATACAAAGTAATCAATGCTGGAAATGGTGTAAACCCGGTAAATCG  
mip3 AGCCAGGCCTGTGTGATTTGCCAAGTGGTTTGGCAATACAAAGTAATCAATGCTGGAAATGGTGTAAACCCGGTAAATCG  
LplCorby AGCCAGGCCTGTGTGATTTGCCAAGTGGTTTGGCAATACAAAGTAATCAATGCTGGAAATGGTGTAAACCCGGTAAATCG  
LP1Lens AGCCAGGCCTGTGTGATTTGCCAAGTGGTTTGGCAATACAAAGTAATCAATGCTGGAAATGGTGTAAACCCGGTAAATCG  
mip1 AGCCAGGCCTGTGTGATTTGCCAAGTGGTTTGGCAATACAAAGTAATCAATGCTGGAAATGGTGTAAACCCGGTAAATCG  
LplParis AGCCAGGCCTGTGTGATTTGCCAAGTGGTTTGGCAATACAAAGTAATCAATGCTGGAAATGGTGTAAACCCGGTAAATCG  
LplPhil AGCCAGGCCTGTGTGATTTGCCAAGTGGTTTGGCAATACAAAGTAATCAATGCTGGAAATGGTGTAAACCCGGTAAATCG

401

mip2 GATACAGTCACTGTGGAATACACTGGTCGCTCGATTGATGGTACCGTTTTTGACAGTACCGAAAAAACCTGGTAAGCCAGC  
mip3 GATACAGTCACTGTGGAATACACTGGTCGCTCGATTGATGGTACCGTTTTTGACAGTACCGAAAAAACCTGGTAAGCCAGC  
LplCorby GATACAGTCACTGTGGAATACACTGGTCGCTCGATTGATGGTACCGTTTTTGACAGTACCGAAAAAACCTGGTAAGCCAGC  
LP1Lens GATACAGTCACTGTGGAATACACTGGTCGCTCGATTGATGGTACCGTTTTTGACAGTACCGAAAAAACCTGGTAAGCCAGC  
mip1 GATACAGTCACTGTGGAATACACTGGTCGCTCGATTGATGGTACCGTTTTTGACAGTACCGAAAAAACCTGGTAAGCCAGC  
LplParis GATACAGTCACTGTGGAATACACTGGTCGCTCGATTGATGGTACCGTTTTTGACAGTACCGAAAAAACCTGGTAAGCCAGC  
LplPhil GATACAGTCACTGTGGAATACACTGGTCGCTCGATTGATGGTACCGTTTTTGACAGTACCGAAAAAACCTGGTAAGCCAGC

481

mip2 AACTTTTCAGGTTTCACAAGTTATCCCAGGATGGACAGAAGCTTTGCAATTTGATGCCAGCTGGATCAACTTGGGAAATTT  
mip3 AACTTTTCAGGTTTCACAAGTTATCCCAGGATGGACAGAAGCTTTGCAATTTGATGCCAGCTGGATCAACTTGGGAAATTT  
LplCorby AACTTTTCAGGTTTCACAAGTTATCCCAGGATGGACAGAAGCTTTGCAATTTGATGCCAGCTGGATCAACTTGGGAAATTT  
LP1Lens AACTTTTCAGGTTTCACAAGTTATCCCAGGATGGACAGAAGCTTTGCAATTTGATGCCAGCTGGATCAACTTGGGAAATTT  
mip1 AACTTTTCAGGTTTCACAAGTTATCCCAGGATGGACAGAAGCTTTGCAATTTGATGCCAGCTGGATCAACTTGGGAAATTT  
LplParis AACTTTTCAGGTTTCACAAGTTATCCCAGGATGGACAGAAGCTTTGCAATTTGATGCCAGCTGGATCAACTTGGGAAATTT  
LplPhil AACTTTTCAGGTTTCACAAGTTATCCCAGGATGGACAGAAGCTTTGCAATTTGATGCCAGCTGGATCAACTTGGGAAATTT

561

mip2 AAGTCCC-----  
mip3 AAGTCCCACAGGCTTGCATATGGCCC  
LplCorby AAGTCCCACAGGCTTGCATATGGCCC  
LP1Lens AAGTCCCACAGGCTTGCATATGGCCC  
mip1 AAGTCCCACAGGCTTGCATATGGCCC  
LplParis AAGTCCCACAGGCTTGCATATGGCCC  
LplPhil AAGTCCCACAGGCTTGCATATGGCCC
