# Supplementary material for: Molecular diversity and high virulence of Legionella pneumophila strains isolated from biofilms developed within a warm spring of a thermal spa
Source: PubMed Central journal article supplement (PMC3564684; doi:10.1186/1471-2180-13-17), 2013-01-28
Supplement: 1471-2180-13-17-S2.pdf [file 1471-2180-13-17-S2.pdf]

**Additional file 2**

Lanes

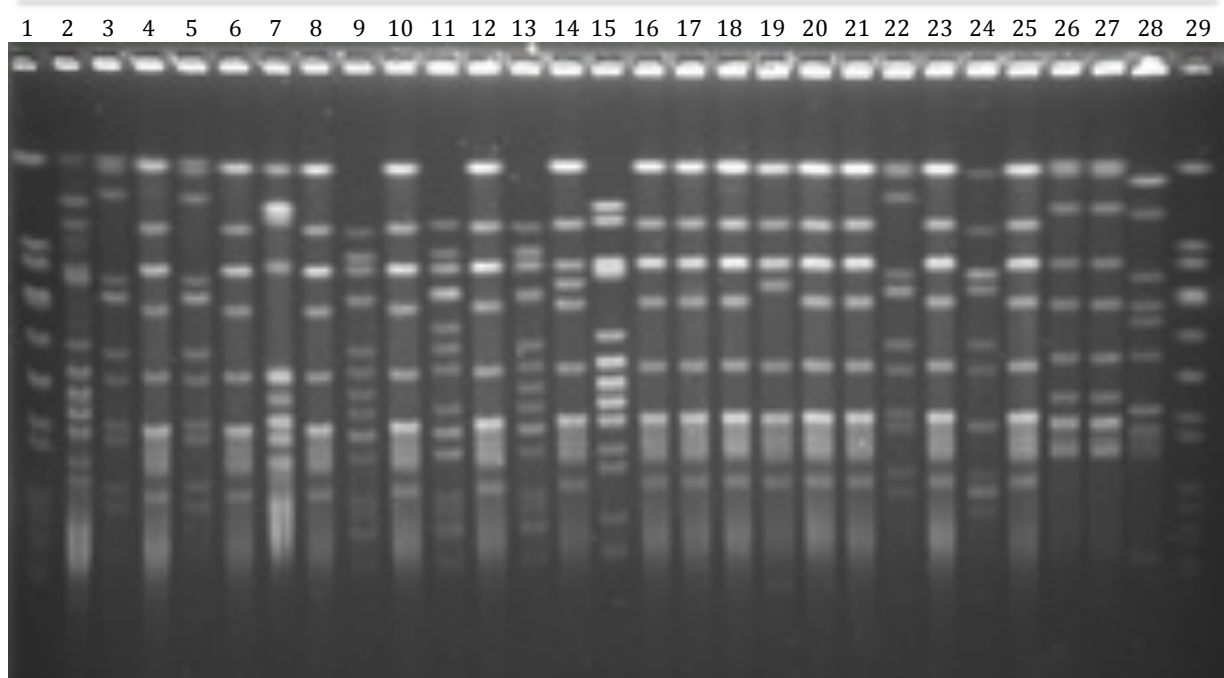

| Lanes | Strains                                | Identification |
|-------|----------------------------------------|----------------|
| 1     | <i>Staphylococcus aureus</i> NCTC 8325 |                |
| 2     | Lorraine strain                        | Lp 1           |
| 3     | Lax B 1                                | Lp 10          |
| 4     | Lax B 2                                | Lp 12          |
| 5     | Lax B 3                                | Lp 10          |
| 6     | Lax B 4                                | Lp 12          |
| 7     | Paris strain                           | Lp 1           |
| 8     | Lax B 5                                | Lp 12          |
| 9     | Lax B 6                                | Lp 1           |
| 10    | Lax B 7                                | Lp 12          |
| 11    | Lax B 8                                | Lp 1           |
| 12    | Lax B 9                                | Lp 12          |
| 13    | Lax B 12                               | Lp 1           |
| 14    | Lax B 13                               | Lp 12          |
| 15    | Lorraine strain                        | Lp 1           |
| 16    | Lax B 14                               | Lp 12          |
| 17    | Lax B 15                               | Lp 12          |
| 18    | Lax B 16                               | Lp 12          |
| 19    | Lax B 17                               | Lp 12          |
| 20    | Lax B 18                               | Lp 12          |
| 21    | Lax B 19                               | Lp 12          |
| 22    | Lax B 20                               | Lp 10          |
| 23    | Lax B 21                               | Lp 12          |
| 24    | Lax B 22                               | Lp 1           |
| 25    | Lax B 23                               | Lp 12          |
| 26    | Lax B 24                               | Lp 1           |
| 27    | Lax B 25                               | Lp1            |
| 28    | Biarritz strain                        | Lp1            |
| 29    | <i>Staphylococcus aureus</i> NCTC 8325 |                |
